# Supplementary material for: Hierarchically porous graphene/wood-derived carbon activated using ZnCl2and decorated within situgrown NiCo2O4for high–performance asymmetric supercapacitors
Source: Royal Society of Chemistry journal article supplement (doi:10.1039/d1nj05027c), 2021-11-18
Supplement: d1nj05027c1.pdf [file d1nj05027c1.pdf]

Electronic Supplementary Material (ESI) for New Journal of Chemistry.

## Supporting Information

### **Hierarchically porous graphene/wood-derived carbon activated using ZnCl<sub>2</sub> and decorated with in situ grown NiCo<sub>2</sub>O<sub>4</sub> for high-performance asymmetric supercapacitors**

Mei-Jiao Zeng<sup>a,b</sup>, Xiaofeng Li<sup>a,\*</sup>, Shu-Meng Hao<sup>b,c</sup>, Jin Qu<sup>a</sup>, Wei Li<sup>a</sup>, Jing Wu<sup>a</sup>, Tianyu Zhao<sup>b</sup>,  
Zhong-Zhen Yu<sup>b,\*</sup>

<sup>a</sup> Beijing Key Laboratory of Advanced Functional Polymer Composites, Beijing University of Chemical Technology, Beijing 100029, China

<sup>b</sup> State Key Laboratory of Organic-Inorganic Composites, College of Materials Science and Engineering, Beijing University of Chemical Technology, Beijing 100029, China

<sup>c</sup> School of Materials Science and Engineering, Georgia Institute of Technology, Atlanta, GA, 30332, United States

E-mails: [xfli@mail.buct.edu.cn](mailto:xfli@mail.buct.edu.cn) (X. Li); [yuzz@mail.buct.edu.cn](mailto:yuzz@mail.buct.edu.cn) (Z.-Z. Yu)

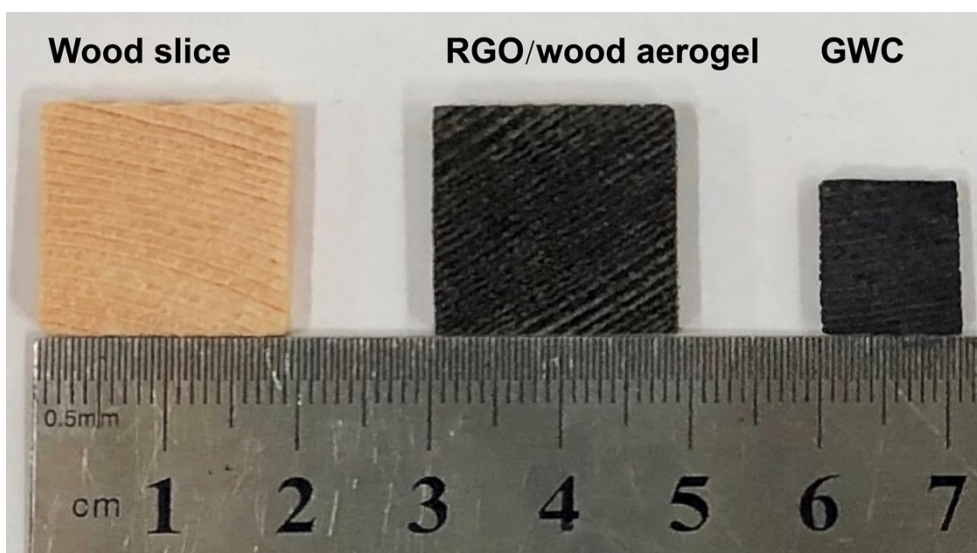

**Fig. S1.** Digital images of wood slice, RGO/wood aerogel, and GWC.

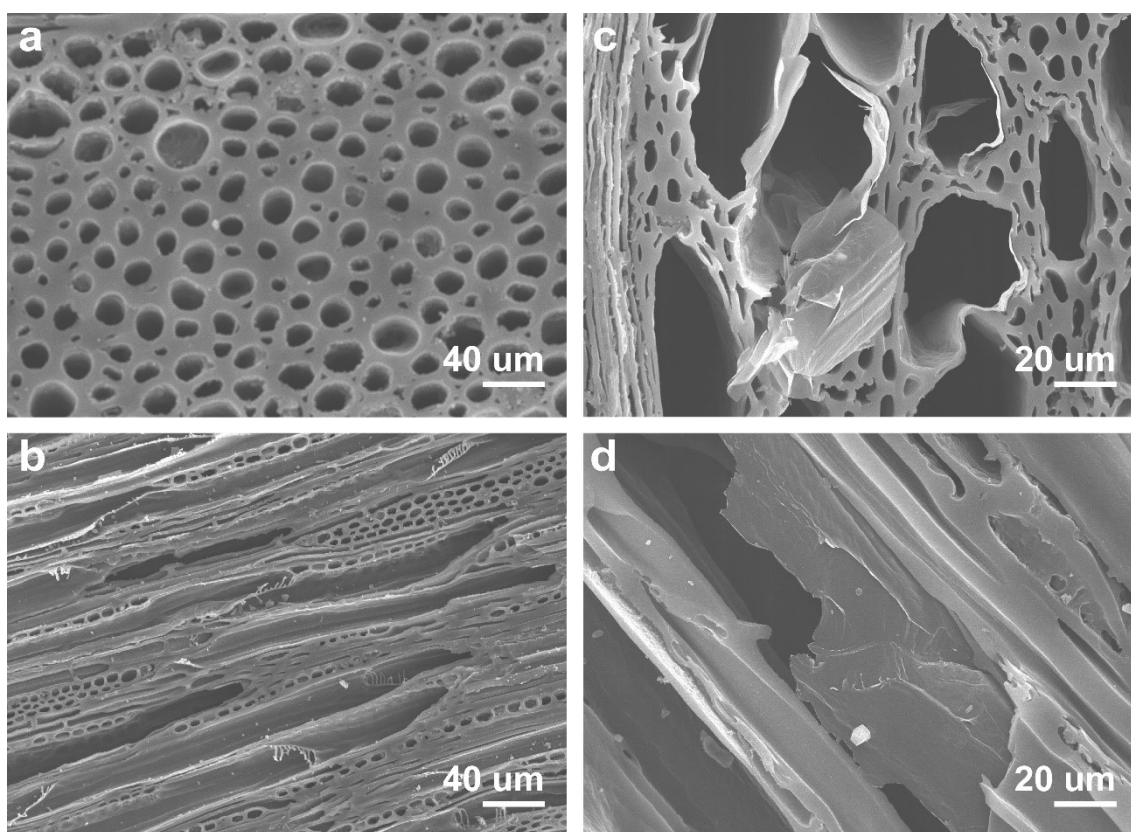

**Fig. S2.** (a) Top-view and (b) side-view SEM images of hardwood carbon. (c) Top-view and (d) side-view SEM images of hardwood carbon filled with RGO.

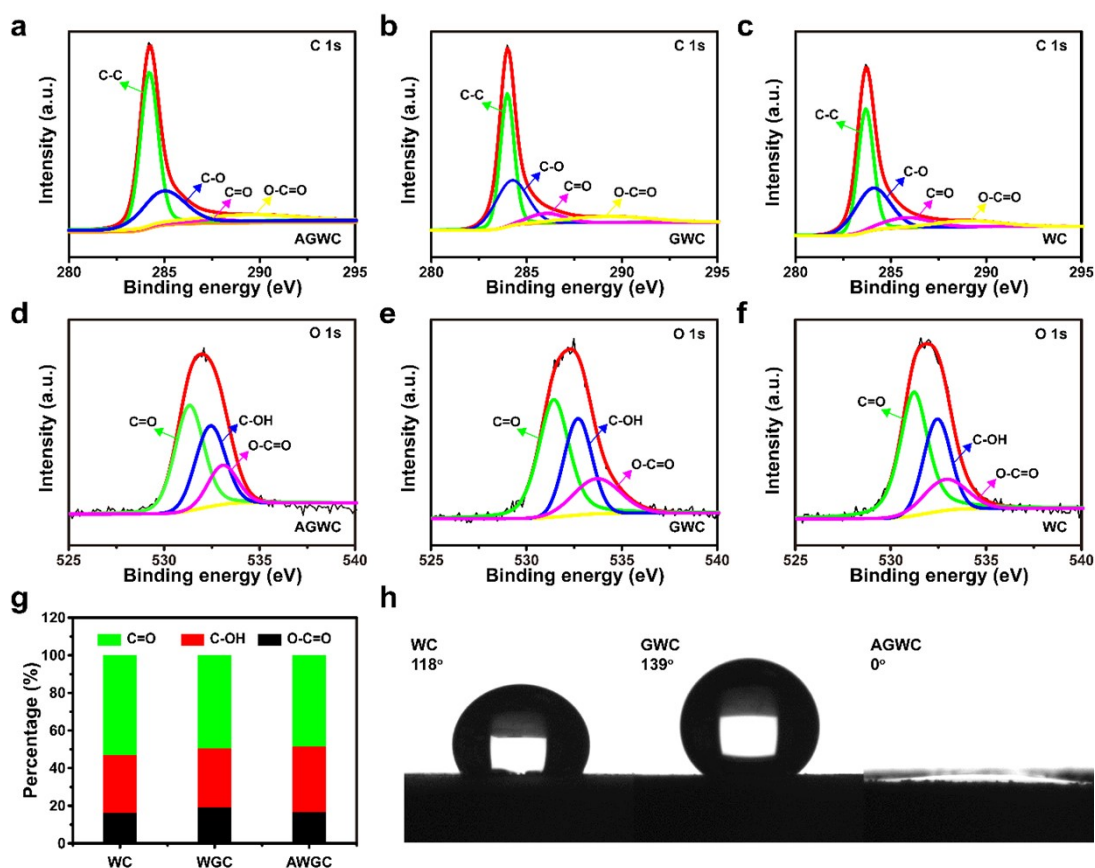

**Fig. S3.** (a) XPS C 1s and (d) O 1s spectra of AGWC. (b) XPS C 1s and (e) O 1s spectra of GWC. (c) XPS C 1s and (f) O 1s spectra of WC. (g) Percentages of oxygen-containing species, and (h) contact angles of water on WC, GWC, and AGWC.

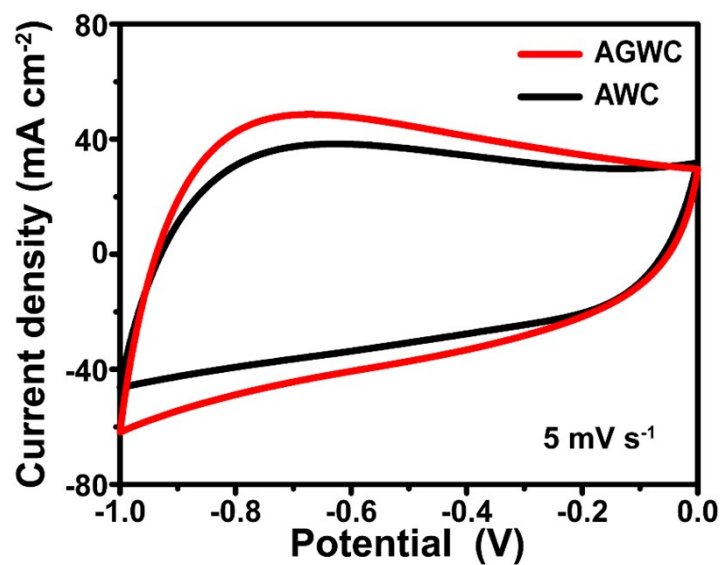

**Fig. S4.** CV curves of AWC and AGWC electrodes in the range of -1 – 0 V at 5 mV s<sup>-1</sup>.

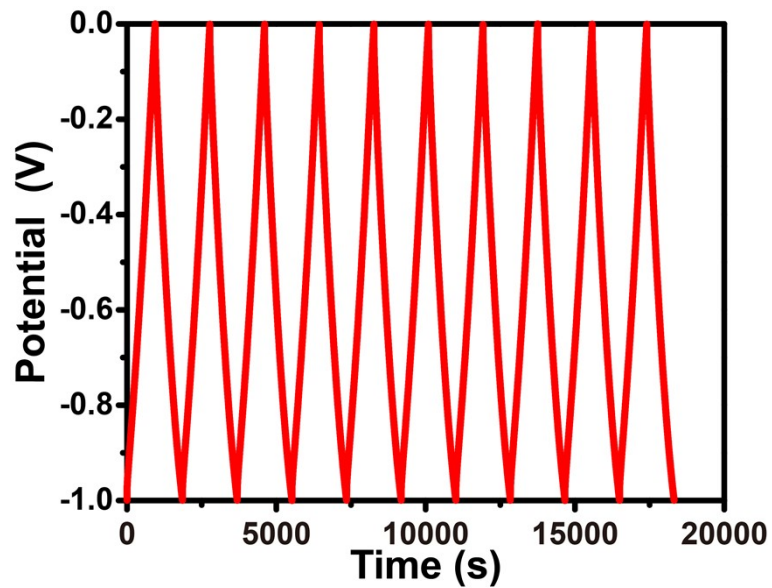

Fig. S5. Charge-discharge profile of the AGWC electrode for 10 cycles at 10 mA cm<sup>-2</sup>.

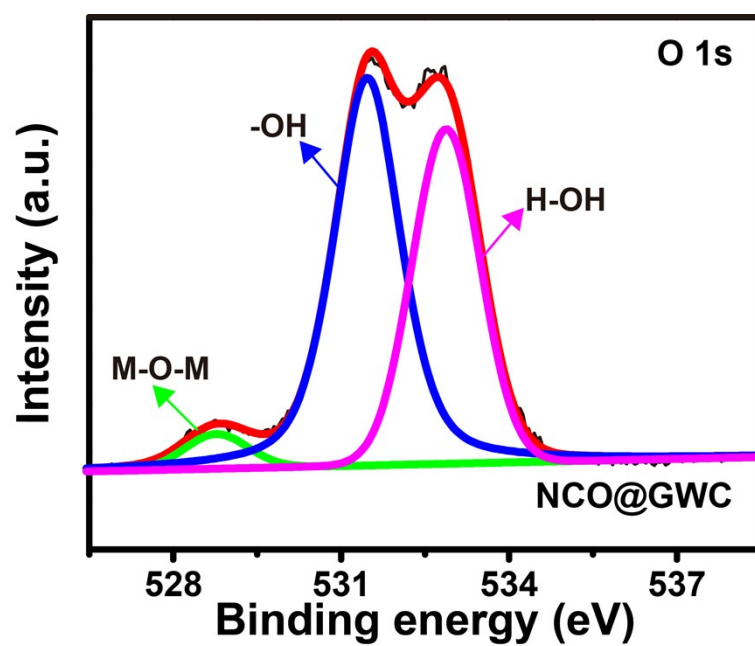

Fig. S6. XPS O 1s spectrum of the NCO@GWC.

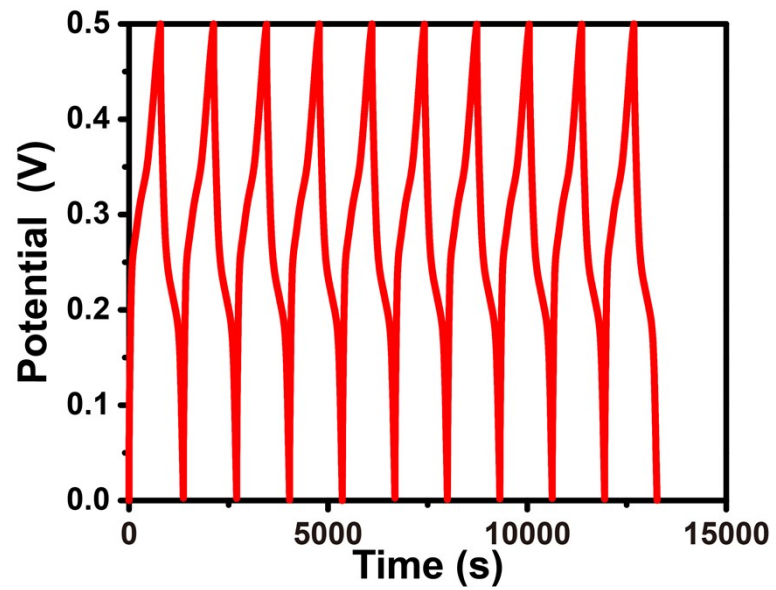

**Fig. S7.** Charge-discharge profile of the NCO@GWC electrode for 10 cycles at  $10 \text{ mA cm}^{-2}$ .

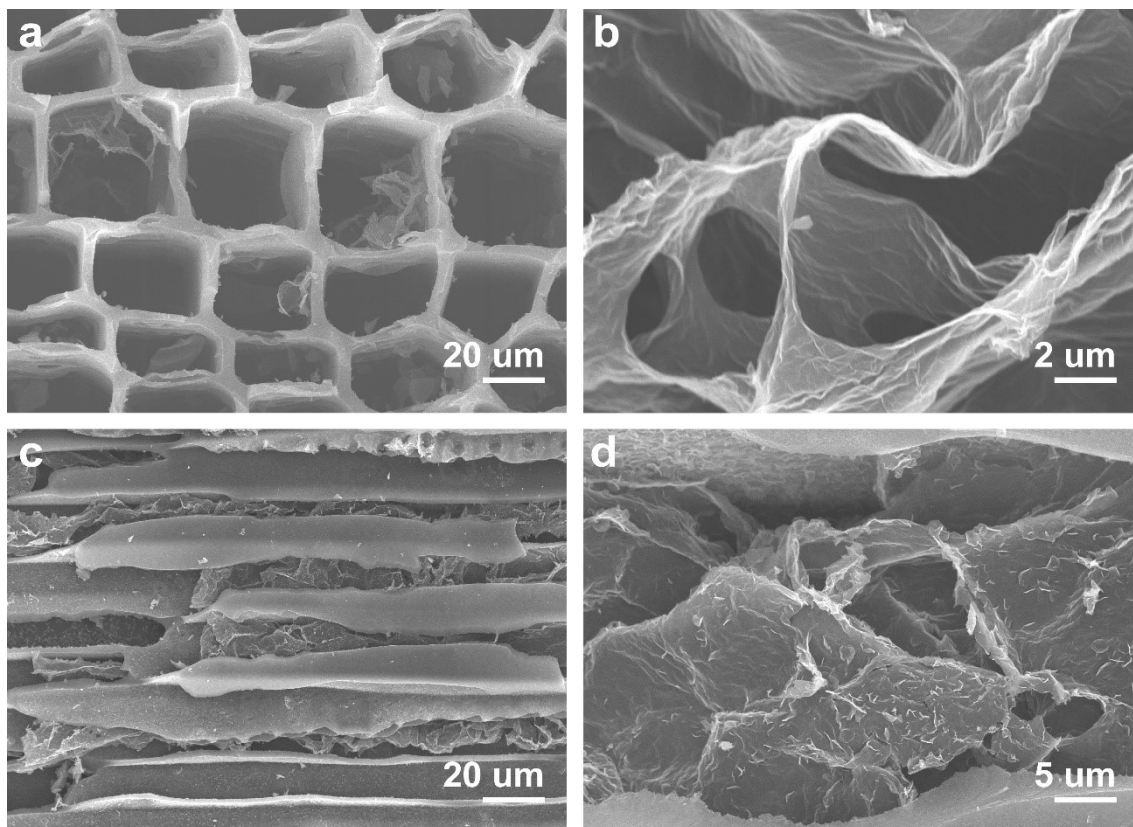

**Fig. S8.** SEM images of the as-assembled (a, b) AGWC and (c, d) NCO@GWC electrodes after cycling.

**Table S1.** Sizes and densities of wood, WC, and GWC.

| <b>Samples</b> | <b>Size (mm<sup>3</sup>)</b> | <b>Density (g cm<sup>-3</sup>)</b> |
|----------------|------------------------------|------------------------------------|
| Wood           | 20 × 20 × 3                  | 0.37                               |
| WC             | 12 × 15 × 2                  | 0.30                               |
| GWC            | 12 × 15 × 2                  | 0.32                               |

**Table S2.** Comparison of capacitances of AGWC with those of other GO-based electrodes.

| <b>Electrodes</b>                | <b>Electrolytes</b>                | <b>Performances</b>                                                                                  | <b>Ref.</b> |
|----------------------------------|------------------------------------|------------------------------------------------------------------------------------------------------|-------------|
| Graphene ribbon films            | 6 M KOH                            | 6700 mF cm <sup>-2</sup> at 5 mA cm <sup>-2</sup><br>318 F g <sup>-1</sup> at 5 mA cm <sup>-2</sup>  | [56]        |
| Hydroxyl-rich graphene hydrogels | 1 M H <sub>2</sub> SO <sub>4</sub> | 2675 mF cm <sup>-2</sup> at 1 mA cm <sup>-2</sup><br>260 F g <sup>-1</sup> at 1 A g <sup>-1</sup>    | [57]        |
| Chlorine-doped graphene films    | 6 M KOH                            | 2312 mF cm <sup>-2</sup> at 1 mA cm <sup>-2</sup><br>210 F g <sup>-1</sup> at 1 A g <sup>-1</sup>    | [58]        |
| AGWC-1                           | 6 M KOH                            | 9462 mF cm <sup>-2</sup> at 1 mA cm <sup>-2</sup><br>158 F g <sup>-1</sup> at 1 mA cm <sup>-2</sup>  | This work   |
| AGWC-2                           | 6 M KOH                            | 10965 mF cm <sup>-2</sup> at 1 mA cm <sup>-2</sup><br>183 F g <sup>-1</sup> at 1 mA cm <sup>-2</sup> | This work   |
| AGWC-3                           | 6 M KOH                            | 10127 mF cm <sup>-2</sup> at 1 mA cm <sup>-2</sup><br>168 F g <sup>-1</sup> at 1 mA cm <sup>-2</sup> | This work   |

**Table S3.** Densities and areal mass loadings of different NCO@GWC samples.

| <b>Sample</b> | <b>Density (g cm<sup>-3</sup>)</b> | <b>Areal mass loading (mg cm<sup>-2</sup>)</b> |
|---------------|------------------------------------|------------------------------------------------|
| NCO@GWC-1     | 0.33                               | 7.5                                            |
| NCO@GWC-2     | 0.35                               | 10                                             |
| NCO@GWC-3     | 0.36                               | 12.9                                           |
| NCO@WC        | 0.33                               | 8.5                                            |

**Table S4.** Comparison of the capacitances of NCO@GWC with those of other NiCo<sub>2</sub>O<sub>4</sub>-based electrodes reported.

| <b>Electrodes</b>                                         | <b>Electrolytes</b> | <b>Performances</b>                                                                                   | <b>Ref.</b> |
|-----------------------------------------------------------|---------------------|-------------------------------------------------------------------------------------------------------|-------------|
| NiCo <sub>2</sub> O <sub>4</sub> @Ni-S                    | 1 M NaOH            | 1850 mF cm <sup>-2</sup> at 8 mA cm <sup>-2</sup><br>926 F g <sup>-1</sup> at 8 mA cm <sup>-2</sup>   | [64]        |
| Oxygen-vacancies-enabled NiCo <sub>2</sub> O <sub>4</sub> | 6 M KOH             | 3800 mF cm <sup>-2</sup> at 2 mA cm <sup>-2</sup><br>338.5 F g <sup>-1</sup> at 2 mA cm <sup>-2</sup> | [65]        |
| NiCo <sub>2</sub> O <sub>4</sub> @RGO                     | 6 M KOH             | 3600 mF cm <sup>-2</sup> at 5 mA cm <sup>-2</sup><br>1125 F g <sup>-1</sup> at 5 mA cm <sup>-2</sup>  | [66]        |
| NCO@GWC-1                                                 | 6 M KOH             | 1927 mF cm <sup>-2</sup> at 1 mA cm <sup>-2</sup><br>257 F g <sup>-1</sup> at 1 mA cm <sup>-2</sup>   | This work   |
| NCO@GWC-2                                                 | 6 M KOH             | 8540 mF cm <sup>-2</sup> at 1 mA cm <sup>-2</sup><br>854 F g <sup>-1</sup> at 1 mA cm <sup>-2</sup>   | This work   |
| NCO@GWC-3                                                 | 6 M KOH             | 4179 mF cm <sup>-2</sup> at 1 mA cm <sup>-2</sup><br>324 F g <sup>-1</sup> at 1 mA cm <sup>-2</sup>   | This work   |
| NCO@WC-2                                                  | 6 M KOH             | 3480 mF cm <sup>-2</sup> at 1 mA cm <sup>-2</sup><br>409 F g <sup>-1</sup> at 1 mA cm <sup>-2</sup>   | This work   |

**Table S5.** Comparison of electrochemical performances of wood-based or carbon-based asymmetric supercapacitors.

| Materials                                                                                         |                                              | Areal Capacitance           | Energy Density                | Power Density                | Ref.      |
|---------------------------------------------------------------------------------------------------|----------------------------------------------|-----------------------------|-------------------------------|------------------------------|-----------|
| Cathodes                                                                                          | Anodes                                       |                             |                               |                              |           |
| NiCo <sub>2</sub> O <sub>4</sub> @TiN NFs                                                         |                                              | 82<br>mF cm <sup>-2</sup>   | 0.083<br>mWh cm <sup>-3</sup> | 5.005<br>mW cm <sup>-3</sup> | [67]      |
| NiCo <sub>2</sub> O <sub>4</sub> @Ni <sub>3</sub> S <sub>2</sub> NWAs<br>3000 mF cm <sup>-2</sup> | Activated carbon                             | 1380<br>mF cm <sup>-2</sup> | 1.89<br>mWh cm <sup>-3</sup>  | 5.81<br>mW cm <sup>-3</sup>  | [68]      |
| CoP NW                                                                                            | MnO <sub>2</sub> NW                          |                             | 0.69<br>mWh cm <sup>-3</sup>  | 10.15<br>mW cm <sup>-3</sup> | [69]      |
| MnO <sub>2</sub> @WC<br>4155 mF cm <sup>-2</sup>                                                  | AWC<br>3204 mF cm <sup>-2</sup>              | 3600<br>mF cm <sup>-2</sup> | 1.6<br>mWh cm <sup>-2</sup>   | 1.04<br>mW cm <sup>-2</sup>  | [35]      |
| Co(OH) <sub>2</sub> @CW<br>3723cm <sup>-2</sup>                                                   | CW                                           | 2200<br>mF cm <sup>-2</sup> | 4.45<br>mWh cm <sup>-3</sup>  | 7.51<br>mW cm <sup>-3</sup>  | [36]      |
| WG@Ni(OH) <sub>2</sub> /Co(OH) <sub>2</sub><br>5306 mF cm <sup>-2</sup>                           | Graphitized wood<br>3060 mF cm <sup>-2</sup> | 2409<br>mF cm <sup>-2</sup> | 0.75<br>mWh cm <sup>-2</sup>  | 0.75<br>mW cm <sup>-2</sup>  | [37]      |
| NCO@GWC<br>8540 mF cm <sup>-2</sup>                                                               | AGWC<br>10965 mF cm <sup>-2</sup>            | 7116<br>mF cm <sup>-2</sup> | 4.9<br>mWh cm <sup>-3</sup>   | 11.7<br>mW cm <sup>-3</sup>  | This work |
